# Supplementary material for: Targeted and Untargeted Approaches Unravel Novel Candidate Genes and Diagnostic SNPs for Quantitative Resistance of the Potato (Solanum tuberosum L.) to Phytophthora infestans Causing the Late Blight Disease
Source: PLoS One. 2016 Jun 9;11(6):e0156254. doi: 10.1371/journal.pone.0156254 (PMC4900573; doi:10.1371/journal.pone.0156254)
Supplement: S5 File — (XLSX) [file pone.0156254.s005.xlsx]

## Sheet: S5 rAUDPC p<0.01
Supplemental file S5: SNPs in candidate genes associated with rAUDPC (p < 0.01) in any of the four association models K1, K2, K2Q and S
Locus index	Marker index	Marker ID (same letter indicates strong LD between SNPs within the locus)	Chromosome	RNA-Seq ID (position v4.03)	SNP alleles (phu/tbr)	Minor frequency allele (MFA)	MFA frequency	Missing values [%]	Model	rAUDPC_minus Log10(P)	rAUDPC_Rsq [%]	Direction of effect of MFA
1	1	arpP1a_SNP900	1		A/G	A	0.323446	3.80435	K1	2.54849	3.65999	decreasing
2	2	TMP14_SNP609	1	73019609	G/A	G	0.203869	8.69565	K2Q	2.14	6.94	?
3	3	AOC_SNP152	2		G/A	A	0.0600559	2.71739	K2Q	2.01	3.7	decreasing
3	3	AOC_SNP152	2		G/A	A	0.0600559	2.71739	K1	2.0124	4.81527	decreasing
3	3	AOC_SNP152	2		G/A	A	0.0600559	2.71739	S	2.49979	4.81527	decreasing
3	3	AOC_SNP152	2		G/A	A	0.0600559	2.71739	K2	2.18	4.17	decreasing
4	4	PQ-lr_SNP600	3	254600	A/C	T	0.288168	28.8043	S	2.39442	6.23225	decreasing
5	5	Smp24_SNP670 (a)	3		C/T	C	0.300296	8.15217	K2Q	2.96	9.1	increasing
5	5	Smp24_SNP670 (a)	3		C/T	C	0.300296	8.15217	K2	3.33	10.25	increasing
5	6	Smp24_SNP674 (a)	3	44501674	T/C	T	0.303779	6.52174	K2Q	2.85	8.75	increasing
5	6	Smp24_SNP674 (a)	3	44501674	T/C	T	0.303779	6.52174	S	2.23298	4.38269	increasing
5	6	Smp24_SNP674 (a)	3	44501674	T/C	T	0.303779	6.52174	K2	3.33	10.08	increasing
6	7	DnaJ8_SNP101	3		T/G	G	0.0472222	2.17391	K2	2.3	7.04	decreasing
6	8	DnaJ8_SNP172	3	57386172	C/A	A	0.203039	1.63043	K2Q	2.66	7.85	decreasing
6	8	DnaJ8_SNP172	3	57386172	C/A	A	0.203039	1.63043	S	2.75132	5.32672	decreasing
6	8	DnaJ8_SNP172	3	57386172	C/A	A	0.203039	1.63043	K2	2.92	8.57	decreasing
7	9	PC_SNP8109 (a)	4		A/T	T	0.152473	1.08696	S	2.61907	5.00263	increasing
7	9	PC_SNP8109 (a)	4		A/T	T	0.152473	1.08696	K2	2.57	7.73	increasing
7	10	PC_SNP8115 (a)	4		T/A	A	0.166209	1.08696	S	2.50841	4.75592	increasing
7	10	PC_SNP8115 (a)	4		T/A	A	0.166209	1.08696	K2	2.47	7.49	increasing
7	11	PC_SNP8187	4		C/A/T	na	na	2.17391	K2Q	2.39	11.08	not analysed
7	11	PC_SNP8187	4		C/A/T	na	na	2.17391	K2	3	13.15	not analysed
8	12	HMGCR_SNP455 (a)	4		C/T	C	0.379412	7.6087	K2Q	4.25	13.82	increasing
8	12	HMGCR_SNP455 (a)	4		C/T	C	0.379412	7.6087	K1	4.04387	13.6318	increasing
8	12	HMGCR_SNP455 (a)	4		C/T	C	0.379412	7.6087	S	6.13984	13.6318	increasing
8	12	HMGCR_SNP455 (a)	4		C/T	C	0.379412	7.6087	K2	4.47	14.61	increasing
8	13	HMGCR_SNP528 (a)	4		A/T	A	0.359467	8.15217	K2Q	2.49	9.12	increasing
8	13	HMGCR_SNP528 (a)	4		A/T	A	0.359467	8.15217	K1	2.36512	8.46795	increasing
8	13	HMGCR_SNP528 (a)	4		A/T	A	0.359467	8.15217	S	3.90695	8.46795	increasing
8	13	HMGCR_SNP528 (a)	4		A/T	A	0.359467	8.15217	K2	2.545	9.44	increasing
8	14	HMGCR_SNP567	4		C/G	G	0.451183	8.15217	K2Q	3.97	13.15	decreasing
8	14	HMGCR_SNP567	4		C/G	G	0.451183	8.15217	K1	3.39178	11.4145	decreasing
8	14	HMGCR_SNP567	4		C/G	G	0.451183	8.15217	S	5.1521	11.4145	decreasing
8	14	HMGCR_SNP567	4		C/G	G	0.451183	8.15217	K2	3.75	12.78	decreasing
8	15	HMGCR_SNP581	4		G/A	G	0.136494	5.43478	K2Q	2.07	7.66	?
8	15	HMGCR_SNP581	4		G/A	G	0.136494	5.43478	K2	2.22	8.22	?
8	16	HMGCR_SNP636	4		C/T	T	0.295714	4.8913	K2Q	5.47	16.35	decreasing
8	16	HMGCR_SNP636	4		C/T	T	0.295714	4.8913	K1	6.05062	15.1385	decreasing
8	16	HMGCR_SNP636	4		C/T	T	0.295714	4.8913	S	6.98725	15.1385	decreasing
8	16	HMGCR_SNP636	4		C/T	T	0.295714	4.8913	K2	4.15	13.17	decreasing
9	17	GT8_SNP266 (a)	5		T/C	T	0.436131	25.5435	K2Q	3.21	13.64	increasing (recessive)
9	17	GT8_SNP266 (a)	5		T/C	T	0.436131	25.5435	K2	3.54	14.89	increasing (recessive)
9	18	GT8_SNP296	5	1981296	C/T	C	0.0528846	15.2174	K1	2.37457	7.28514	increasing
9	18	GT8_SNP296	5	1981296	C/T	C	0.0528846	15.2174	S	3.1834	7.28514	increasing
9	19	GT8_SNP363 (a)	5		T/G	T	0.386691	24.4565	K2Q	2.66	11.32	?
9	19	GT8_SNP363 (a)	5		T/G	T	0.386691	24.4565	K2	3.16	13.33	?
10	20	ATPase_SNP7981 (b)	5	5067981	A/G	G	0.366319	21.7391	K1	2.52686	10.0711	decreasing
10	20	ATPase_SNP7981 (b)	5	5067981	A/G	G	0.366319	21.7391	S	3.97336	10.0711	decreasing
10	20	ATPase_SNP7981 (b)	5	5067981	A/G	G	0.366319	21.7391	K2Q	3.13	12.65	decreasing
10	20	ATPase_SNP7981 (b)	5	5067981	A/G	G	0.366319	21.7391	K2	3.24	13.13	decreasing
10	21	ATPase_SNP8019 (b)	5	5068019	C/T	T	0.358156	23.3696	S	2.64434	6.50687	decreasing
10	21	ATPase_SNP8019 (b)	5	5068019	C/T	T	0.358156	23.3696	K2Q	2.89	12.18	decreasing
10	21	ATPase_SNP8019 (b)	5	5068019	C/T	T	0.358156	23.3696	K2	2.92	12.52	decreasing
10	22	ATPase_SNP8060 (b)	5	5068060	G/A	A	0.396617	27.7174	S	2.89264	7.63896	decreasing
10	23	ATPase_SNP8102	5	5068102	C/T	T	0.258865	23.3696	K2Q	2.51	10.82	decreasing
10	23	ATPase_SNP8102	5	5068102	C/T	T	0.258865	23.3696	K1	2.33887	9.54614	decreasing
10	23	ATPase_SNP8102	5	5068102	C/T	T	0.258865	23.3696	S	3.71403	9.54614	decreasing
10	23	ATPase_SNP8102	5	5068102	C/T	T	0.258865	23.3696	K2	2.44	10.96	decreasing
10	24	ATPase_SNP8176	5	5068176	C/T	T	0.231343	27.1739	K1	2.67795	8.85424	decreasing
10	24	ATPase_SNP8176	5	5068176	C/T	T	0.231343	27.1739	S	3.31877	8.85424	decreasing
10	24	ATPase_SNP8176	5	5068176	C/T	T	0.231343	27.1739	K2Q	2.09	9.86	decreasing
10	24	ATPase_SNP8176	5	5068176	C/T	T	0.231343	27.1739	K2	2.24	10.48	decreasing
10	25	ATPase_SNP8218	5	5068218	C/T	T	0.180357	23.913	K2Q	2.34	10.28	decreasing
10	25	ATPase_SNP8218	5	5068218	C/T	T	0.180357	23.913	S	3.21743	8.19497	decreasing
10	25	ATPase_SNP8218	5	5068218	C/T	T	0.180357	23.913	K2	2.6	11.38	decreasing
10	26	ATPase_SNP8326 (b)	5	5068326	A/C	C	0.388889	26.6304	K2Q	2.37	10.79	decreasing
10	26	ATPase_SNP8326 (b)	5	5068326	A/C	C	0.388889	26.6304	K1	2.57845	10.2106	decreasing
10	26	ATPase_SNP8326 (b)	5	5068326	A/C	C	0.388889	26.6304	S	3.80063	10.2106	decreasing
10	26	ATPase_SNP8326 (b)	5	5068326	A/C	C	0.388889	26.6304	K2	2.49	11.47	decreasing
10	27	ATPase_SNP8491	5		T/C	C	0.11478	13.587	K2Q	4.84	13.35	decreasing
10	27	ATPase_SNP8491	5		T/C	C	0.11478	13.587	K1	4.63527	12.5988	decreasing
10	27	ATPase_SNP8491	5		T/C	C	0.11478	13.587	S	5.35498	12.5988	decreasing
10	27	ATPase_SNP8491	5		T/C	C	0.11478	13.587	K2	4.49	12.72	decreasing
11	28	Coi1_SNP1690	5		A/G	G	0.0971429	4.8913	S	2.29382	4.44834	decreasing
12	29	StGP28_SNP794	6	49101794	G/A	A	0.145221	26.087	K1	2.39895	5.72277	decreasing
12	29	StGP28_SNP794	6	49101794	G/A	A	0.145221	26.087	S	2.29814	5.72277	decreasing
12	30	StGP28_SNP811	6		T/G	G	0.178846	29.3478	K2Q	2.48	10.12	?
12	30	StGP28_SNP811	6		T/G	G	0.178846	29.3478	K2	2.08	9.05	?
12	31	StGP28_SNP886	6	49101886	A/T	T	0.242593	26.6304	K1	2.10526	6.73829	decreasing
12	31	StGP28_SNP886	6	49101886	A/T	T	0.242593	26.6304	S	2.62649	6.73829	decreasing
13	32	EXO_SNP750 (a)	6		A/G	G	0.242733	6.52174	K1	2.07009	3.99342	increasing
13	32	EXO_SNP750 (a)	6		A/G	G	0.242733	6.52174	S	2.06641	3.99342	increasing
13	33	EXO_SNP751 (a)	6		C/T	T	0.139535	6.52174	K1	2.10476	4.38246	increasing
13	33	EXO_SNP751 (a)	6		C/T	T	0.139535	6.52174	S	2.23288	4.38246	increasing
14	34	OPR3_SNP713	7		A/G	A	0.242938	3.80435	K2Q	3.38	11.05	decreasing
14	34	OPR3_SNP713	7		A/G	A	0.242938	3.80435	S	2.52948	4.93704	decreasing
14	34	OPR3_SNP713	7		A/G	A	0.242938	3.80435	K2	3.05	10.34	decreasing
15	35	PSBR_SNP5492	7		G/C	G	0.494863	20.6522	S	2.00913	4.5432	decreasing
16	36	Plox1_SNP7618 (a)	8		A/C	C	0.0138889	2.17391	K2Q	4.02	11.23	decreasing
16	37	Plox1_SNP8089 (a)	8		A/C	C	0.0138889	2.17391	K1	2.66081	9.13579	decreasing
16	37	Plox1_SNP8089 (a)	8		A/C	C	0.0138889	2.17391	S	4.42866	9.13579	decreasing
16	37	Plox1_SNP8089 (a)	8		A/C	C	0.0138889	2.17391	K2	4.04	11.4	decreasing
16	38	Plox1_SNP8344 (a)	8		A/G	G	0.0138122	1.63043	K2Q	4.58	11.09	decreasing
16	38	Plox1_SNP8344 (a)	8		A/G	G	0.0138122	1.63043	K1	2.45737	9.06645	decreasing
16	38	Plox1_SNP8344 (a)	8		A/G	G	0.0138122	1.63043	S	4.41942	9.06645	decreasing
16	38	Plox1_SNP8344 (a)	8		A/G	G	0.0138122	1.63043	K2	4.36	10.84	decreasing
17	39	Potlx3_SNP7495	8		T/C	C	0.444751	1.63043	K2Q	2.48	8.46	decreasing
17	39	Potlx3_SNP7495	8		T/C	C	0.444751	1.63043	K2	2.6	8.89	decreasing
18	40	CYP71D11_SNP346 (a)	8	46879346	C/T	T	0.0675287	5.43478	K2Q	2.92	8.76	decreasing
18	40	CYP71D11_SNP346 (a)	8	46879346	C/T	T	0.0675287	5.43478	K1	2.27324	3.8021	decreasing
18	40	CYP71D11_SNP346 (a)	8	46879346	C/T	T	0.0675287	5.43478	S	2.00317	3.8021	decreasing
18	40	CYP71D11_SNP346 (a)	8	46879346	C/T	T	0.0675287	5.43478	K2	2.77	8.52	decreasing
18	41	CYP71D11_SNP655 (a)	8		A/T	T	0.0383333	18.4783	K1	2.15653	3.13588	decreasing
18	42	CYP71D11_SNP688	8	46879688	A/T	T	0.0404624	5.97826	K1	2.35796	2.22668	increasing
18	43	CYP71D11_SNP706 (a)	8		A/G	G	0.0534682	5.97826	K2Q	2.7	8.26	decreasing
18	43	CYP71D11_SNP706 (a)	8		A/G	G	0.0534682	5.97826	K1	3.37174	6.48549	decreasing
18	43	CYP71D11_SNP706 (a)	8		A/G	G	0.0534682	5.97826	S	3.14172	6.48549	decreasing
18	43	CYP71D11_SNP706 (a)	8		A/G	G	0.0534682	5.97826	K2	2.58	8.02	decreasing
18	44	CYP71D11_SNP752 (a)	8		T/C	C	0.0677083	21.7391	K2Q	3.97	13.71	decreasing
18	44	CYP71D11_SNP752 (a)	8		T/C	C	0.0677083	21.7391	K2	4.02	13.92	decreasing
19	45	HSP70_SNP9226	9		A/C	C	0.191011	3.26087	S	2.24138	4.25512	increasing
20	46	Lox1St2_SNP6505 (a)	9		A/T	T	0.0890805	5.43478	K1	2.79996	2.03329	decreasing
20	47	Lox1St2_SNP6571 (a)	9		C/T	T	0.118785	1.63043	K2Q	2.48	6.16	decreasing
20	47	Lox1St2_SNP6571 (a)	9		C/T	T	0.118785	1.63043	K1	4.21964	6.37162	decreasing
20	47	Lox1St2_SNP6571 (a)	9		C/T	T	0.118785	1.63043	S	3.21627	6.37162	decreasing
20	47	Lox1St2_SNP6571 (a)	9		C/T	T	0.118785	1.63043	K2	2.07	5.29	decreasing
20	48	Lox1St2_SNP6667 (a)	9		C/A	A	0.118785	1.63043	K1	2.78842	2.01162	decreasing
20	49	Lox1St2_SNP6981	9		C/T	C	0.183526	5.97826	K1	2.46493	3.67189	decreasing
21	50	Rpi-vnt1_SNP440	9		T/C	C	0.216851	1.63043	K2Q	2.92	9.62	decreasing
21	50	Rpi-vnt1_SNP440	9		T/C	C	0.216851	1.63043	K1	2.21317	2.99593	decreasing
21	50	Rpi-vnt1_SNP440	9		T/C	C	0.216851	1.63043	K2	2.74	9.36	decreasing
21	51	Rpi-vnt1_SNP544	9		C/T	T	0.195055	1.08696	K2Q	3	8.59	decreasing
21	51	Rpi-vnt1_SNP544	9		C/T	T	0.195055	1.08696	S	2.37647	4.46226	decreasing
21	51	Rpi-vnt1_SNP544	9		C/T	T	0.195055	1.08696	K2	2.68	8.02	decreasing
22	52	CaM-10_SNP247	10	59617247	G/T	G	0.304167	2.17391	K2Q	2.57	8.73	decreasing
22	52	CaM-10_SNP247	10	59617247	G/T	G	0.304167	2.17391	S	2.90409	5.70091	decreasing
22	52	CaM-10_SNP247	10	59617247	G/T	G	0.304167	2.17391	K2	3.04	10.13	decreasing
23	53	BSDR4_SNP339	11		C/T	T	0.356742	3.26087	K2Q	2.51	8.66	heterozygotes lower than homozygotes
23	53	BSDR4_SNP339	11		C/T	T	0.356742	3.26087	K2	3.28	10.91	heterozygotes lower than homozygotes
23	54	BSDR4_SNP444	11		A/T	T	0.069209	3.80435	K2Q	2.67	8.05	heterozygotes lower than homozygotes
23	55	BSDR4_SNP469	11		G/T	T	0.108333	2.17391	K2Q	2.15	5.37	increasing
23	55	BSDR4_SNP469	11		G/T	T	0.108333	2.17391	S	2.01729	3.70741	increasing
23	55	BSDR4_SNP469	11		G/T		0.108333	2.17391	K2	2.23	5.73	increasing
24	56	KiTH-2_SNP3689 (a)	11		C/T	T	0.0762195	10.8696	K2Q	2.52	9.44	decreasing
24	56	KiTH-2_SNP3689 (a)	11		C/T	T	0.0762195	10.8696	S	3.27385	7.16027	decreasing
24	56	KiTH-2_SNP3689 (a)	11		C/T	T	0.0762195	10.8696	K2	2.19	8.63	decreasing
24	57	KiTH-2_SNP3806 (a)	11		T/A	A	0.0436047	6.52174	K2Q	3.85	12.63	decreasing
24	57	KiTH-2_SNP3806 (a)	11		T/A	A	0.0436047	6.52174	S	2.85775	5.85247	decreasing
24	57	KiTH-2_SNP3806 (a)	11		T/A	A	0.0436047	6.52174	K2	2.77	9.84	decreasing
24	58	KiTH-2_SNP3987 (a)	11		C/G	G	0.0592486	5.97826	K2Q	3.33	9.96	decreasing
24	58	KiTH-2_SNP3987 (a)	11		C/G	G	0.0592486	5.97826	S	2.86425	5.83442	decreasing
24	58	KiTH-2_SNP3987 (a)	11		C/G	G	0.0592486	5.97826	K2	2.07	6.8	decreasing
